# Supplementary material
Source: publisher figshare collection journal article supplement (https://tandf.figshare.com/articles/dataset/_/6704519)
Supplement: Supplementary file 1 [file 1]

Archive with 2 entries (2 files):
- idre_a_1464604_sm1252.pdf
- idre_a_1464604_sm1251.pdf
