# Supplementary material
Source: publisher figshare collection journal article supplement (https://tandf.figshare.com/articles/dataset/_/6704519)
Supplement: Supplementary file 1 [file 1 › idre_a_1464604_sm1251.pdf]

Supplementary Table 1. Agreement between test occasion 1 and 2 separately calculated for rater A and B (intra-rater agreement)

| Test items                                    | Rater A, Test occasion 1 vs. 2 |       |       |      | Rater B, Test occasion 1 vs. 2 |      |       |      |
|-----------------------------------------------|--------------------------------|-------|-------|------|--------------------------------|------|-------|------|
|                                               | PA %                           | RP    | RC    | RV   | PA %                           | RP   | RC    | RV   |
| <b>A. UPPER EXTREMITY</b>                     |                                |       |       |      |                                |      |       |      |
| <b>I. Reflex activity</b>                     |                                |       |       |      |                                |      |       |      |
| Flexors                                       | 100                            |       |       |      | 100                            |      |       |      |
| Extensors                                     | 100                            |       |       |      | 90                             | ≥0.1 |       |      |
| <b>II. Movement within synergies</b>          |                                |       |       |      |                                |      |       |      |
| Flexor synergy, retraction                    | 60                             | ≥0.1  |       |      | 80                             | ≥0.1 | ≥0.1  |      |
| Flexor synergy, elevation                     | 70                             | ≥0.1* | ≥0.1  |      | 90                             |      |       |      |
| Flexor synergy, abduction (90°)               | 70                             |       |       |      | 90                             |      |       |      |
| Flexor synergy, external rotation             | 80                             | ≥0.1  | ≥0.1  |      | 100                            |      |       |      |
| Flexor synergy, elbow flexion                 | 80                             | ≥0.1  |       |      | 80                             |      | ≥0.1  |      |
| Flexor synergy, forearm supination            | 90                             |       | ≥0.1  |      | 90                             |      |       |      |
| Extensor synergy, adduction/rotation          | 90                             |       | ≥0.1  |      | 90                             |      | ≥0.1  |      |
| Extensor synergy, elbow extension             | 90                             |       |       |      | 100                            |      |       |      |
| Extensor synergy, forearm pronation           | 90                             |       | ≥0.1  |      | 90                             |      | ≥0.1  |      |
| <b>III. Movement in mixed synergies</b>       |                                |       |       |      |                                |      |       |      |
| Hand to lumbar spine                          | 100                            |       |       |      | 80                             | ≥0.1 | ≥0.1  |      |
| Shoulder flexion 0° - 90°                     | 90                             |       |       |      | 100                            |      |       |      |
| Pronation-supination                          | 100                            |       |       |      | 100                            |      |       |      |
| <b>IV. Movement with little or no synergy</b> |                                |       |       |      |                                |      |       |      |
| Shoulder abduction 0 - 90°                    | 90                             |       |       |      | 100                            |      |       |      |
| Shoulder flexion 90°-180°                     | 90                             |       |       |      | 100                            |      |       |      |
| Pronation-supination                          | 90                             |       | ≥0.1  |      | 90                             |      |       |      |
| <b>V. Normal reflex activity</b>              |                                |       |       |      |                                |      |       |      |
| Biceps, triceps, flexor fingers               | 90                             | ≥0.1  |       |      | 90                             | ≥0.1 |       |      |
| <b>B. WRIST</b>                               |                                |       |       |      |                                |      |       |      |
| Stability at 15° dorsiflexion                 | 90                             |       | ≥0.1  |      | 90                             |      | ≥0.1  |      |
| Repeated dorsiflexion/volar flexion           | 90                             |       |       |      | 100                            |      |       |      |
| Stability at 15° dorsiflexion                 | 100                            |       |       |      | 100                            |      |       |      |
| Repeated dorsiflexion/volar flexion           | 80                             | ≥0.1  | ≥0.1  |      | 100                            |      |       |      |
| Circumduction                                 | 70                             |       |       |      | 90                             |      |       |      |
| <b>C. HAND</b>                                |                                |       |       |      |                                |      |       |      |
| Mass flexion                                  | 100                            |       |       |      | 100                            |      |       |      |
| Mass extension                                | 100                            |       |       |      | 100                            |      |       |      |
| Hook grasp                                    | 100                            |       |       |      | 90                             |      |       |      |
| Thumb adduction                               | 100                            |       |       |      | 100                            |      |       |      |
| Pincer grasp, opposition                      | 90                             |       | ≥0.1  |      | 90                             |      | ≥0.1  |      |
| Cylinder grasp                                | 90                             |       | ≥0.1  |      | 90                             |      | ≥0.1  |      |
| Spherical grasp                               | 100                            |       |       |      | 100                            |      |       |      |
| <b>D. COORDINATION/SPEED</b>                  |                                |       |       |      |                                |      |       |      |
| Tremor                                        | 80                             | ≥0.1  |       |      | 80                             |      |       | ≥0.1 |
| Dysmetria                                     | 90                             |       |       |      | 70                             | ≥0.1 |       |      |
| Time                                          | 40                             | ≥0.1* |       | ≥0.1 | 40                             | ≥0.1 | ≥0.1* | ≥0.1 |
| <b>E. LOWER EXTREMITY</b>                     |                                |       |       |      |                                |      |       |      |
| <b>I. Reflex activity</b>                     |                                |       |       |      |                                |      |       |      |
| Flexors                                       | 100                            |       |       |      | 100                            |      |       |      |
| Extensors                                     | 100                            |       |       |      | 100                            |      |       |      |
| <b>II. Movement in synergies</b>              |                                |       |       |      |                                |      |       |      |
| Flexor synergy, hip flexion                   | 90                             | ≥0.1  |       |      | 90                             | ≥0.1 |       |      |
| Flexor synergy, knee flexion                  | 80                             | ≥0.1  | ≥0.1* |      | 90                             |      | ≥0.1  |      |
| Flexor synergy, dorsal flexion                | 90                             |       | ≥0.1  |      | 80                             |      |       |      |
| Extensor synergy, hip extension               | 90                             | ≥0.1  |       |      | 90                             |      | ≥0.1* |      |
| Extensor synergy, hip adduction               | 90                             | ≥0.1  |       |      | 90                             |      | ≥0.1* |      |
| Extensor synergy, knee extension              | 90                             | ≥0.1  |       |      | 90                             |      | ≥0.1* |      |
| Extensor synergy, plantar flexion             | 90                             |       | ≥0.1  |      | 80                             |      |       |      |

### III. Synergies in mixture of volitional movement

|                    |     |    |
|--------------------|-----|----|
| Knee flexion       | 90  | 90 |
| Ankle dorsiflexion | 100 | 90 |

### IV. Movement with little or no synergy

|                     |    |      |    |      |
|---------------------|----|------|----|------|
| Knee flexion to 90° | 80 | ≥0.1 | 90 |      |
| Ankle dorsiflexion  | 90 | ≥0.1 | 80 | ≥0.1 |

### V. Normal reflex activity

|                                        |    |      |    |      |
|----------------------------------------|----|------|----|------|
| Knee flexors, Achilles patellar tendon | 90 | ≥0.1 | 90 | ≥0.1 |
|----------------------------------------|----|------|----|------|

### F. COORDINATION/SPEED

|           |    |      |           |              |
|-----------|----|------|-----------|--------------|
| Tremor    | 70 | ≥0.1 | <b>50</b> | ≥0.1         |
| Dysmetria | 70 | ≥0.1 | <b>60</b> |              |
| Time      | 70 | ≥0.1 | 70        | ≥0.1         |
|           |    |      |           | <b>≥0.1*</b> |

Abbreviations: vs., versus; RP, relative position (systematic disagreement); RC, relative concentration (systematic disagreement); RV, relative variance (random variance); ≥0.1; disagreement but statistically non-significant; ≥0.1\*; statistically significant disagreement; The PA values smaller than 70 and statistically significant disagreements are in bold
