# Supplementary material
Source: publisher figshare collection journal article supplement (https://tandf.figshare.com/articles/dataset/_/6704519)
Supplement: Supplementary file 1 [file 1 › idre_a_1464604_sm1252.pdf]

Supplementary Table 2. Agreement between rater A and B separately calculated for test occasion 1 and 2 (inter-rater agreement)

| TEST                                          | Test occasion 1, Rater A vs. B |       |      |    | Test occasion 2, Rater A vs. B |      |      |    |
|-----------------------------------------------|--------------------------------|-------|------|----|--------------------------------|------|------|----|
|                                               | PA %                           | RP    | RC   | RV | PA %                           | RP   | RC   | RV |
| <b>A. Upper extremity</b>                     |                                |       |      |    |                                |      |      |    |
| <b>I. Reflex activity</b>                     |                                |       |      |    |                                |      |      |    |
| Flexors                                       | 100                            |       |      |    | 100                            |      |      |    |
| Extensors                                     | 90                             |       |      |    | 100                            |      |      |    |
| <b>II. Movement within synergies</b>          |                                |       |      |    |                                |      |      |    |
| Flexor synergy, retraction                    | <b>50</b>                      |       | ≥0.1 |    | 90                             |      |      |    |
| Flexor synergy, elevation                     | <b>60</b>                      | ≥0.1* | ≥0.1 |    | 100                            |      |      |    |
| Flexor synergy, abduction (90°)               | <b>60</b>                      |       |      |    | 100                            |      |      |    |
| Flexor synergy, external rotation             | 90                             |       |      |    | 90                             |      |      |    |
| Flexor synergy, elbow flexion                 | 90                             |       |      |    | 90                             |      | ≥0.1 |    |
| Flexor synergy, supination                    | 70                             |       | ≥0.1 |    | 70                             | ≥0.1 | ≥0.1 |    |
| Extensor synergy, adduction/rotation          | 90                             |       | ≥0.1 |    | 70                             |      | ≥0.1 |    |
| Extensor synergy, elbow extension             | 80                             | ≥0.1  | ≥0.1 |    | 90                             |      | ≥0.1 |    |
| Extensor synergy, forearm pronation           | 80                             |       |      |    | 100                            |      |      |    |
| <b>III. Movement mixing synergies</b>         |                                |       |      |    |                                |      |      |    |
| Hand to lumbar spine                          | 80                             | ≥0.1  | ≥0.1 |    | 100                            |      |      |    |
| Shoulder flexion 0° - 90°                     | 90                             |       |      |    | 100                            |      |      |    |
| Pronation-supination                          | 100                            |       |      |    | 100                            |      |      |    |
| <b>IV. Movement with little or no synergy</b> |                                |       |      |    |                                |      |      |    |
| Shoulder abduction 0 - 90°                    | 90                             |       |      |    | 100                            |      |      |    |
| Shoulder flexion 90°-180°                     | 90                             |       |      |    | 100                            |      |      |    |
| Pronation-supination                          | 90                             |       |      |    | 90                             |      | ≥0.1 |    |
| <b>V. Normal reflex activity</b>              |                                |       |      |    |                                |      |      |    |
| Biceps, triceps, flexor fingers               | 100                            |       |      |    | 90                             |      |      |    |
| <b>B. WRIST</b>                               |                                |       |      |    |                                |      |      |    |
| Stability at 15° dorsiflexion                 | 100                            |       |      |    | 100                            |      |      |    |
| Repeated dorsiflexion/volar flexion           | 90                             |       |      |    | 100                            |      |      |    |
| Stability at 15° dorsiflexion                 | 90                             |       |      |    | 90                             |      |      |    |
| Repeated dorsiflexion/volar flexion           | 80                             |       |      |    | 80                             | ≥0.1 | ≥0.1 |    |
| Circumduction                                 | 80                             |       |      |    | 80                             |      |      |    |
| <b>C. HAND</b>                                |                                |       |      |    |                                |      |      |    |
| Mass flexion                                  | 100                            |       |      |    | 100                            |      |      |    |
| Mass extension                                | 100                            |       |      |    | 100                            |      |      |    |
| Hook grasp                                    | 100                            |       |      |    | 90                             |      |      |    |
| Thumb adduction                               | 100                            |       |      |    | 100                            |      |      |    |
| Pincer grasp, opposition                      | 100                            |       |      |    | 100                            |      |      |    |
| Cylinder grasp                                | 100                            |       |      |    | 100                            |      |      |    |
| Spherical grasp                               | 100                            |       |      |    | 100                            |      |      |    |
| <b>D. COORDINATION/SPEED</b>                  |                                |       |      |    |                                |      |      |    |
| Tremor                                        | 90                             | ≥0.1  |      |    | 80                             |      |      |    |
| Dysmetria                                     | 100                            |       |      |    | 80                             |      | ≥0.1 |    |
| Time                                          | 100                            |       |      |    | 80                             | ≥0.1 |      |    |
| <b>E. LOWER EXTREMITY</b>                     |                                |       |      |    |                                |      |      |    |
| <b>I. Reflex activity</b>                     |                                |       |      |    |                                |      |      |    |
| Flexors                                       | 100                            |       |      |    | 100                            |      |      |    |
| Extensors                                     | 100                            |       |      |    | 100                            |      |      |    |
| <b>II. Voluntary movement in synergies</b>    |                                |       |      |    |                                |      |      |    |
| Flexor synergy, hip flexion                   | 90                             | ≥0.1  |      |    | 90                             | ≥0.1 |      |    |
| Flexor synergy, knee flexion                  | 100                            |       |      |    | 90                             | ≥0.1 |      |    |
| Flexor synergy, dorsal flexion                | 100                            |       |      |    | 90                             |      | ≥0.1 |    |
| Extensor synergy, hip extension               | 90                             | ≥0.1  |      |    | 100                            |      |      |    |
| Extensor synergy, hip adduction               | 90                             | ≥0.1  |      |    | 100                            |      |      |    |
| Extensor synergy, knee extension              | 90                             | ≥0.1  |      |    | 100                            |      |      |    |
| Extensor synergy, plantar flexion             | 100                            |       |      |    | 90                             |      | ≥0.1 |    |

**III. Movement in mixed synergies**

|                    |     |     |
|--------------------|-----|-----|
| Knee flexion       | 100 | 100 |
| Ankle dorsiflexion | 90  | 100 |

**IV. Movement with little or no synergy**

|                     |     |     |      |
|---------------------|-----|-----|------|
| Knee flexion to 90° | 90  | 100 |      |
| Ankle dorsiflexion  | 100 | 90  | ≥0.1 |

**V. Normal reflex activity**

|                                         |    |      |      |    |
|-----------------------------------------|----|------|------|----|
| Knee flexors, Achilles, patellar tendon | 80 | ≥0.1 | ≥0.1 | 80 |
|-----------------------------------------|----|------|------|----|

**F. COORDINATION/SPEED**

|           |           |      |      |      |      |
|-----------|-----------|------|------|------|------|
| Tremor    | <b>60</b> | ≥0.1 | ≥0.1 | 70   | ≥0.1 |
| Dysmetria | <b>60</b> |      | ≥0.1 | ≥0.1 | 90   |
| Time      | 80        | ≥0.1 |      | 90   | ≥0.1 |

---

Abbreviations: vs, versus; RP, relative position (systematic disagreement); RC, relative concentration (systematic disagreement); RV, relative variance (random variance); ≥0.1; disagreement but statistically non-significant; ≥0.1\*; statistically significant disagreement; The PA values smaller than 70 and statistically significant disagreements are in bold.
